# Supplementary material for: Amyloid-Beta Co-Pathology Is a Major Determinant of the Elevated Plasma GFAP Values in Amyotrophic Lateral Sclerosis
Source: MDPI journal article supplement (doi:10.3390/ijms241813976), 2023-09-12
Supplement: s1 [file s1]

**Amyloid-beta co-pathology is a major determinant of the elevated plasma GFAP values in amyotrophic lateral sclerosis**

Andrea Mastrangelo<sup>†</sup>, Veria Vacchiano<sup>†</sup>, Corrado Zenesini, Edoardo Ruggeri, Simone Baiardi, Arianna Cherici, Patrizia Avoni, Barbara Polischi, Francesca Santoro, Sabina Capellari, Rocco Liguori, Piero Parchi.

<sup>a</sup> Dipartimento di Scienze Biomediche e Neuromotorie, Università di Bologna, (DIBINEM), Bologna, Italia

<sup>b</sup> IRCCS, Istituto delle Scienze Neurologiche di Bologna, Bologna, Italia

<sup>†</sup>: These authors contributed equally to this work and share first authorship.

**Correspondence to:** Prof. Piero Parchi, IRCCS Istituto delle Scienze Neurologiche, Ospedale Bellaria, Via Altura 1/8, 40139 Bologna, Italy. E-mail: [piero.parchi@unibo.it](mailto:piero.parchi@unibo.it). Phone: +39-051-4966740. Fax: +39-051-4966208.

**Keywords:** amyotrophic lateral sclerosis, Alzheimer's disease, GFAP, biomarker

## SUPPLEMENTARY RESULTS

**Table S1. Neuropsychological results in the whole ALS cohorts and in the AD/ALS and not-AD/ALS subcohorts**

|                                                                                   | <b>Total ALS<br/>(n=156)</b> | <b>AD/ALS<br/>(n=9)</b> | <b>not-AD/ALS<br/>(n=147)</b> |
|-----------------------------------------------------------------------------------|------------------------------|-------------------------|-------------------------------|
| <b>ECAS total scores</b> (age-and education-adjusted), <b>n</b>                   | 108.2<br>(96.1-116.8),88     | 89.2<br>(79.9-112.0),4  | 108.4<br>(96.8-116.8),84      |
| <b>ECAS total scores</b> (equivalent scores), <b>n</b>                            | 4.0<br>(3.0-4.0),88          | 2.0<br>(1.2-3.5),4      | 4.0<br>(3.0-4.0),84           |
| <b>ECAS ALS-specific scores</b> (age-and education-adjusted), <b>n</b>            | 79.7<br>(71.9-86.1),88       | 64.4<br>(61.2-84.4),4   | 79.9<br>(72.6-86.1),84        |
| <b>ECAS ALS-specific scores</b> (equivalent scores), <b>n</b>                     | 4.0<br>(3.0-4.0),88          | 2.0<br>(2.0-3.5),4      | 4.0<br>(3.0-4.0),84           |
| <b>ECAS language sub-scores</b> (age-and education-adjusted), <b>n</b>            | 25.5<br>(23.2-27.0),87       | 22.8<br>(20.4-28.0),3   | 25.6<br>(23.3-27.0),84        |
| <b>ECAS verbal fluency sub-scores</b> (age-and education-adjusted), <b>n</b>      | 18.7<br>(15.2-21.1),86       | 18.3<br>(15.2-21.2),3   | 18.7<br>(15.0-21.1),83        |
| <b>ECAS executive functions sub-scores</b> (age-and education-adjusted), <b>n</b> | 36.3<br>(32.1-40.1),87       | 29.3<br>(22.9-40.3)     | 36.7<br>(32.4-40.1),84        |
| <b>ECAS ALS-nonspecific scores</b> (age-and education-adjusted), <b>n</b>         | 27.3<br>(23.9-30.6),88       | 24.8<br>(18.4-27.8),4   | 27.3<br>(24.1-30.6),84        |
| <b>ECAS ALS-nonspecific scores</b> (equivalent scores), <b>n</b>                  | 4.0<br>(2.0-4.0),88          | 3.0<br>(1.2-4.0),4      | 4.0<br>(2.0-4.0),84           |
| <b>ECAS memory sub-scores</b> (age-and education-adjusted), <b>n</b>              | 16.0<br>(13.0-18.44),87      | 15.7<br>(9.1-17.1),3    | 16.0<br>(13.0-18.6),84        |
| <b>ECAS visuo-spatial sub-scores</b> (age-and education-adjusted), <b>n</b>       | 11.9<br>(11.4-12.2),87       | 11.8<br>(10.9-12.5),3   | 11.9<br>(11.4-12.2),84        |
| <b>MMSE, n</b>                                                                    | 29.0<br>(28.0-30.0),114      | 28.0<br>(22.5-29.0),5   | 29.0<br>(28.0-30.0),109       |
| <b>MMSE</b> (age-and education-adjusted), <b>n</b>                                | 28.1<br>(26.7-29.0),113      | 25.7<br>(22.9-29.4),5   | 28.8<br>(27.5-30),108         |
| <b>Rey Auditory Verbal Learning test</b> (immediate recall), <b>n*</b>            | 40.2<br>(32.9-46.3),114      | 34.6<br>(21.1-40.4),5   | 40.3<br>(33.0-46.3),109       |
| <b>Rey Auditory Verbal Learning test</b> (delayed recall), <b>n*</b>              | 8.0<br>(5.9-9.7),113         | 9.4<br>(2.7-10.5),5     | 7.9<br>(6.0-9.7),108          |
| <b>Short-term visual memory, n*</b>                                               | 19.6<br>(17.2-20.9),114      | 15.8<br>(14.2-18.0),5   | 19.7<br>(17.4-20.9),109       |
| <b>Simple verbal analogies test, n*</b>                                           | 16.3<br>(13.7-17.6),114      | 15.7<br>(13.4-17.3),5   | 16.4<br>(13.7-17.7),109       |
| <b>BDMB, n*</b>                                                                   | 1.8<br>(1.1-2.3),107         | 1.1<br>(-0.5-2.1),5     | 1.8<br>(1.2-2.3),102          |
| <b>FAB, n*</b>                                                                    | 16.4<br>(14.6-17.4),27       | 16.9<br>(16.4-17.4),2   | 16.0<br>(14.5-17.6),25        |
| <b>Freehand copy of drawings test, n*</b>                                         | 10.4<br>(9.5-11.4),96        | 9.5<br>(7.2-10.0),4     | 10.6<br>(9.5-11.5),92         |
| <b>Category fluency test, n*</b>                                                  | 38.0<br>(31.0-46.0),111      | 29.3<br>(18.2-39.9),4   | 38.0<br>(31.2-46.0),107       |
| <b>Letter fluency test, n*</b>                                                    | 30.3<br>(22.4-37.4),110      | 23.0<br>(14.3-33.9),4   | 30.4<br>(23.9-37.6),106       |

\*Test scores are age- and education-adjusted;  
Test scores are expressed as median (interquartile range).

Abbreviations: AD, Alzheimer's Disease; ALS, amyotrophic lateral sclerosis; BMDB, Brief Mental Deterioration Battery; ECAS, Edinburgh Cognitive and Behavioural ALS Screen; FAB, Frontal assessment Battery; MMSE, Mini Mental State Examination.

**Table S2. Univariable Cox Regression analysis for prognostic value of plasma biomarkers and clinical-laboratory variables in ALS patients**

| Variable                           |                          | Univariable COX regression |                  |
|------------------------------------|--------------------------|----------------------------|------------------|
|                                    |                          | HR (95% CI)                | p-value          |
| Sex                                |                          | 1.34 (0.84-2.15)           | 0.224            |
| Age at sampling                    |                          | 1.03 (1.009-1.05)          | <b>0.005</b>     |
| Time from clinical onset to sample |                          | 0.87 (0.72-1.05)           | 0.143            |
| King's stage                       | Stage 1                  | Ref                        | <b>&lt;0.001</b> |
|                                    | Stage 2                  | 1.88 (0.25-14.3)           | 0.543            |
|                                    | Stage 3                  | 4.78 (0.66-34.59)          | 0.122            |
|                                    | Stage 4                  | 32.99 (4.07-267.56)        | <b>0.001</b>     |
| BMI                                |                          | 0.99 (0.94-1.04)           | 0.617            |
| DPR                                | Slow progressors         | Ref                        | Ref              |
|                                    | Intermediate progressors | 2.27 (1.31-3.94)           | <b>0.004</b>     |
|                                    | Fast progressor          | 4.15 (2.37-7.27)           | <b>&lt;0.001</b> |
| FTD status                         |                          | 1.97 (1.01-3.85)           | <b>0.048</b>     |
| Onset type                         | Spinal                   | Ref                        | Ref              |
|                                    | Bulbar                   | 2.34 (1.39-3.94)           | <b>0.001</b>     |
|                                    | Pyramidal                | 1.13 (0.35-3.64)           | 0.837            |
|                                    | Pseudopolyneuritic       | 0.84 (0.33-2.12)           | 0.716            |
| Clinical Phenotype                 | Classic                  | Ref                        |                  |
|                                    | Bulbar                   | 1.76 (0.96-3.21)           | 0.067            |
|                                    | PUMN                     | 1.03 (0.53-1.99)           | 0.938            |
|                                    | PLMN                     | 1.09 (0.46-2.56)           | 0.843            |
| ALSFRS-R scale                     |                          | 0.89 (0.86-0.92)           | <b>&lt;0.001</b> |
| Genetic status                     | Wild type                | Ref                        | Ref              |
|                                    | <i>SOD1</i>              | 1.35 (0.33-5.52)           | 0.678            |
|                                    | <i>C9orf72</i>           | 1.59 (0.81-3.1)            | 0.179            |
| Blood-brain barrier index          |                          | 1.02 (0.96-1.08)           | 0.58             |
| CPK levels                         |                          | 0.99 (0.99-1)              | 0.183            |
| Plasma GFAP                        |                          | 2.46 (1.91-3.01)           | <b>&lt;0.001</b> |
| Plasma GFAP                        | Lowest tertile           | Ref                        | Ref              |
|                                    | Intermediate tertile     | 1.21 (0.68-2.13)           | 0.519            |
|                                    | Highest tertile          | 2.80 (1.59-4.92)           | <b>&lt;0.001</b> |
| Plasma p-Tau181                    |                          | 1.11 (1.02-1.2)            | <b>0.016</b>     |
| Plasma NFL                         |                          | 1.01 (1.006-1.01)          | <b>&lt;0.001</b> |

Significant p-values are reported in bold.

Abbreviations: ALSFRS-R, amyotrophic lateral sclerosis functional rating scale revised; BMI, body mass index; CI, confidence interval; CPK, creatine phosphokinase; DPR, disease progression rate; FTD, frontotemporal dementia; GFAP, glial fibrillary acidic protein; HR, hazard ratio; NFL, neurofilament light chain; PLMN, prevalent lower motor neuron; p-tau181, phosphorylated tau 181; PUMN, prevalent upper motor neuron; Ref, reference.

**Table S3. Multivariable Cox Regression analysis for plasma GFAP and clinical prognostic factors in ALS**

| Variable        |                          | HR (95% CI)      | P-value          |
|-----------------|--------------------------|------------------|------------------|
| Plasma GFAP     | Lowest tertile           | Ref              | Ref              |
|                 | Intermediate tertile     | 0.83 (0.43-1.60) | 0.58             |
|                 | Highest tertile          | 0.96 (0.44-2.08) | 0.92             |
| Age at sampling |                          | 1.02 (0.99-1.05) | 0.06             |
| Onset type      | Spinal                   | Ref              | Ref              |
|                 | Bulbar                   | 2.23 (1.24-4.02) | <b>0.007</b>     |
|                 | Pyramidal                | 0.48 (0.13-1.80) | 0.28             |
|                 | Pseudopolyneuritic       | 0.45 (0.17-1.22) | 0.12             |
| ALSFRS-R scale  |                          | 0.91 (0.87-0.95) | <b>&lt;0.001</b> |
| FTD status      |                          | 1.22 (0.58-2.58) | 0.60             |
| DPR             | Slow progressors         | Ref              | Ref              |
|                 | Intermediate progressors | 2.33 (1.27-4.24) | <b>0.006</b>     |
|                 | Fast progressors         | 2.58 (1.36-4.89) | <b>0.004</b>     |

Significant p-values are reported in bold.

Abbreviations: ALSFRS-R, amyotrophic lateral sclerosis functional rating scale revised; CI, confidence interval; DPR, disease progression rate; FTD, frontotemporal dementia; GFAP, glial fibrillary acidic protein; HR, hazard ratio; Ref, reference.
